# Supplementary material for: Aging affects sex- and organ-specific trace element profiles in mice
Source: PubMed Central journal article supplement (PMC7377894; doi:10.18632/aging.103572), 2020-07-03
Supplement: aging-12-103572-s001..pdf [file aging-12-103572-s001..pdf]

SUPPLEMENTARY FIGURES

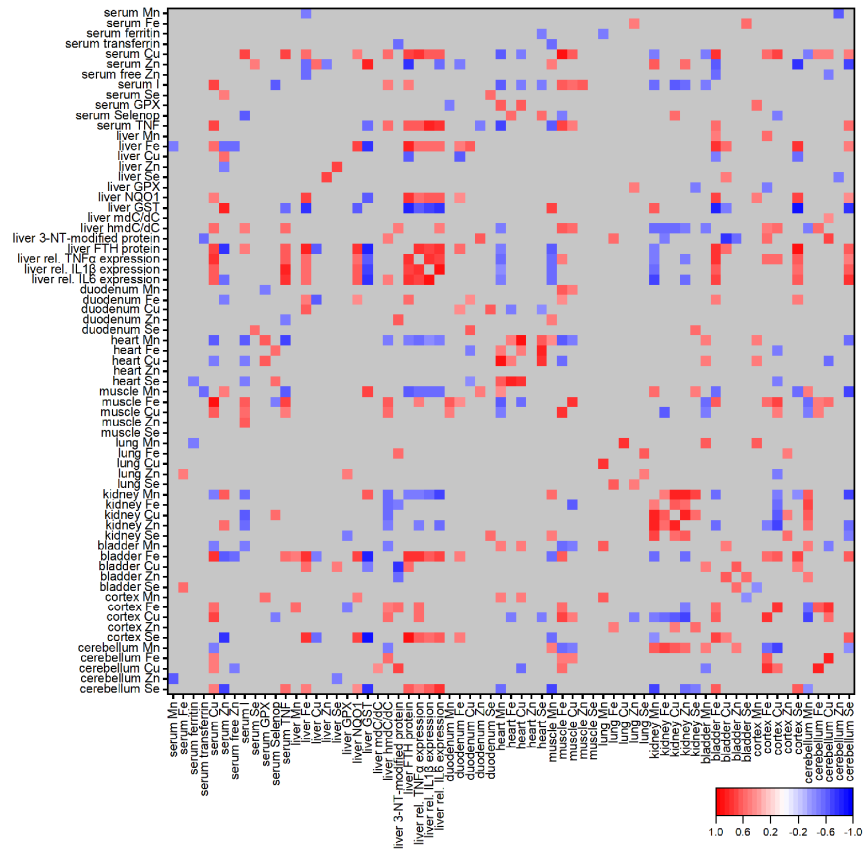

**Supplementary Figure 1. Pairwise correlation coefficients among studied markers based on Spearman’s correlation.** TE concentrations determined by ICP/MS and various TE-related markers of 4-5 adult (24 weeks) and old (109-114 weeks) mice of both sexes fed with a chow diet were correlated in a pairwise manner according to Spearman. Correlation coefficients varying between -1 and 1 are indicated by colored changes. Thereby, blue and red indicate significant negative and positive correlations, respectively, while grey indicates no significant correlation ( $p > 0.05$ ).

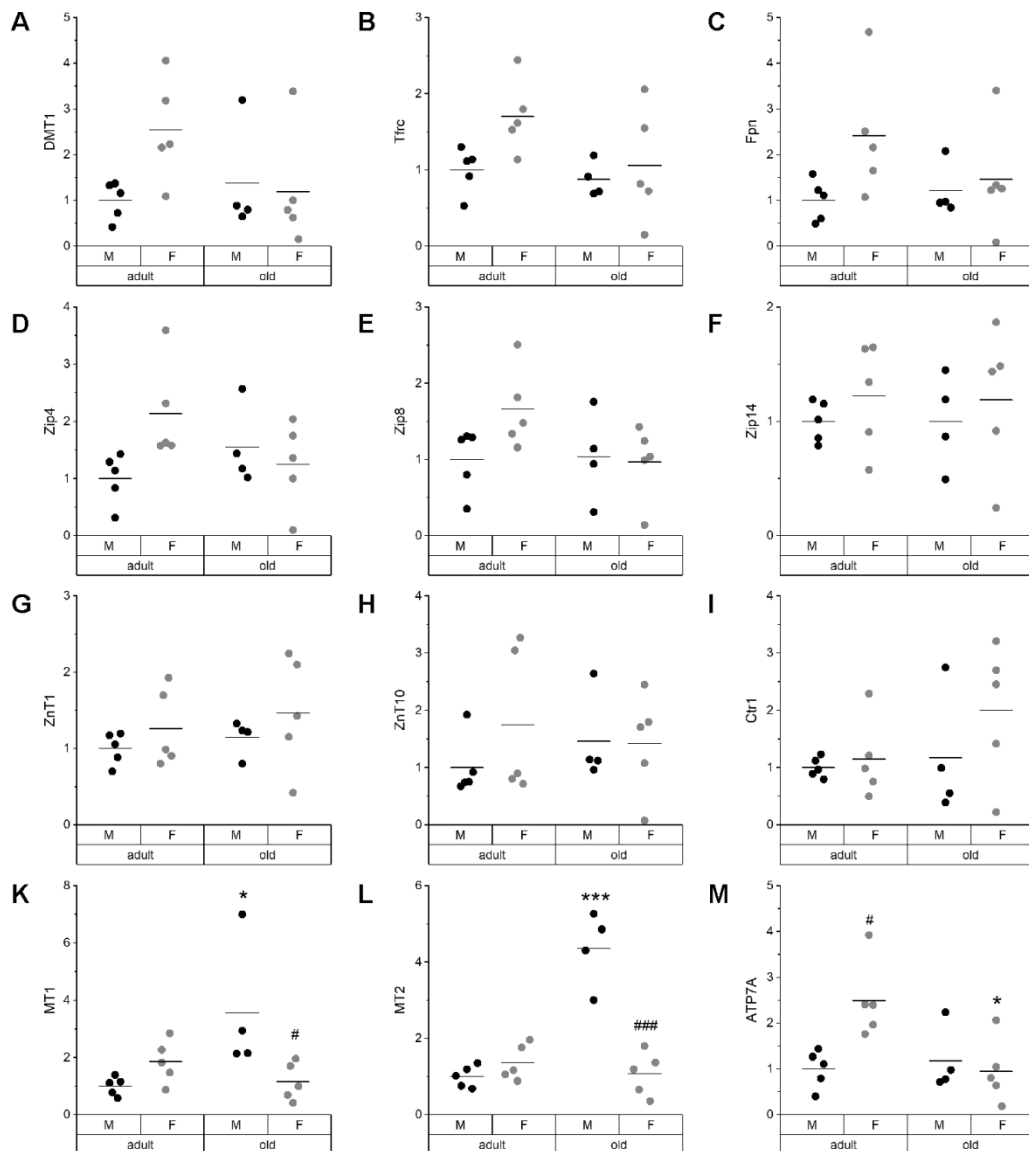

**Supplementary Figure 2. Expression analysis of various TE-related genes in the duodenum.** Relative expression levels of TE-related genes in the duodenum of 4-5 adult (24 weeks) and old (109-114 weeks) mice of both sexes fed with a chow diet *ad libitum*. Expression levels were normalized to a composite factor based on the house-keeping genes *Hprt* and *Rpl13a*, finally variances are expressed as fold change compared to male adults. Statistical testing based on Two-Way ANOVA and post hoc analysis using Bonferroni's test with \*  $p < 0.05$ , \*\*\*  $p < 0.001$  vs. adult and #  $p < 0.05$ , ###  $p < 0.001$  vs. male.

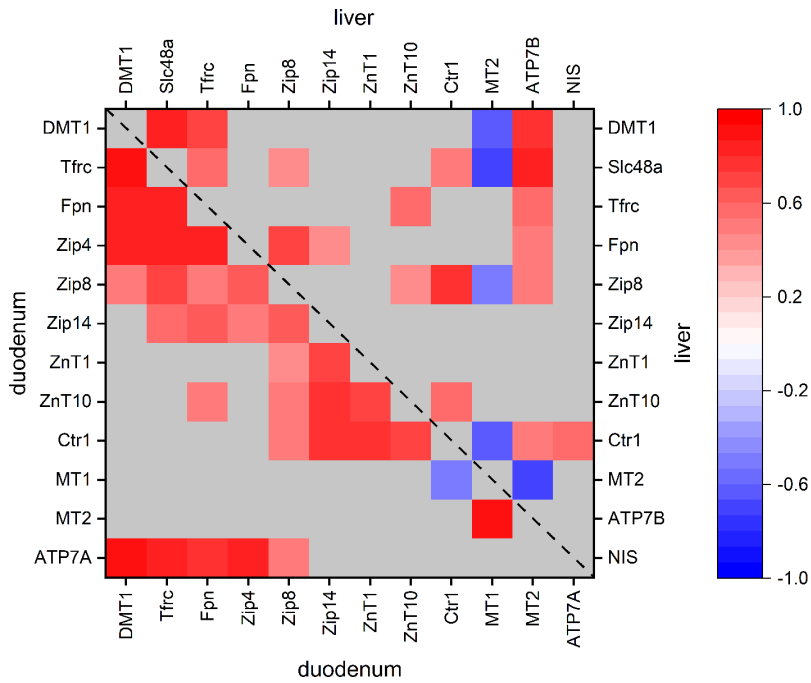

**Supplementary Figure 3. Pairwise correlation coefficients among TE-related genes in duodenum and liver based on Spearman’s correlation.** Relative expression levels of transporters or binding proteins for the TEs Cu, Fe, Mn, or Zn in the duodenum and liver of 4-5 adult (24 weeks) and old (109-114 weeks) mice of both sexes fed with a chow diet *ad libitum* were assessed by qRT-PCR. Expression levels were normalized to a composite factor based on the house-keeping genes Hprt and Rpl13a and correlated according to Spearman. Correlation coefficients vary between -1 and 1, indicated by colored changes. Thereby, blue and red indicate significant negative and positive correlations, respectively, while grey indicates no significant correlations ( $p > 0.05$ ).

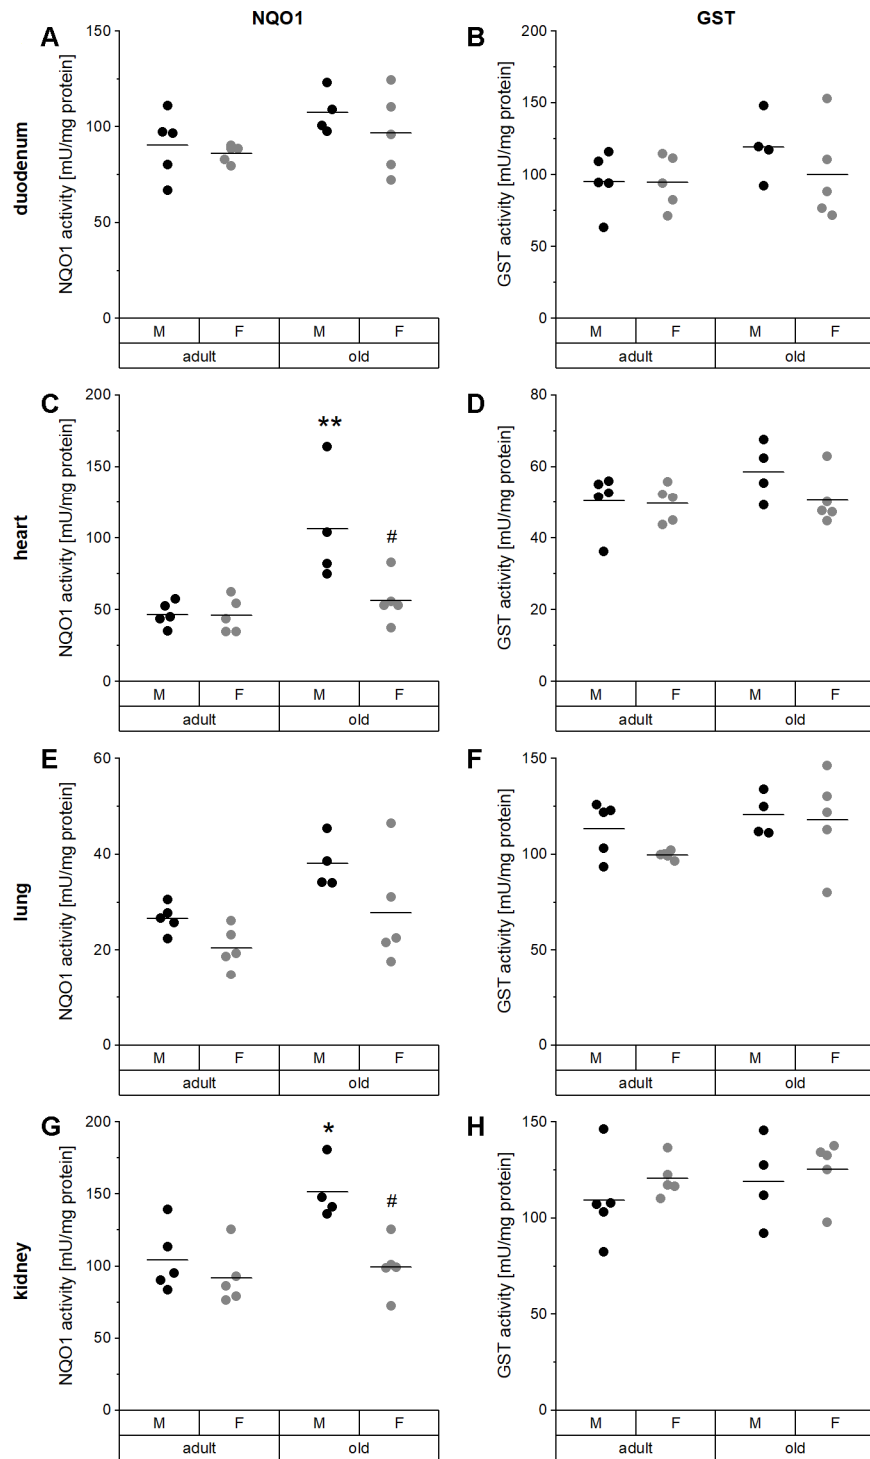

**Supplementary Figure 4. Enzyme activities in various organs.** The enzyme activity of Nrf2 targets NQO1 (A, C, E, G) and GST (B, D, F, H) were determined by activity assay. Samples were either organ samples of duodenum (A, B), heart (C, D), lung (E, F), or kidney (G, H) of 4-5 adult (24 weeks) and old (109-114 weeks) mice of both sexes. Statistical testing based on Two-Way ANOVA and post hoc analysis using Bonferroni's test with \*\*  $p < 0.01$  vs. adult and #  $p < 0.05$  vs. male.

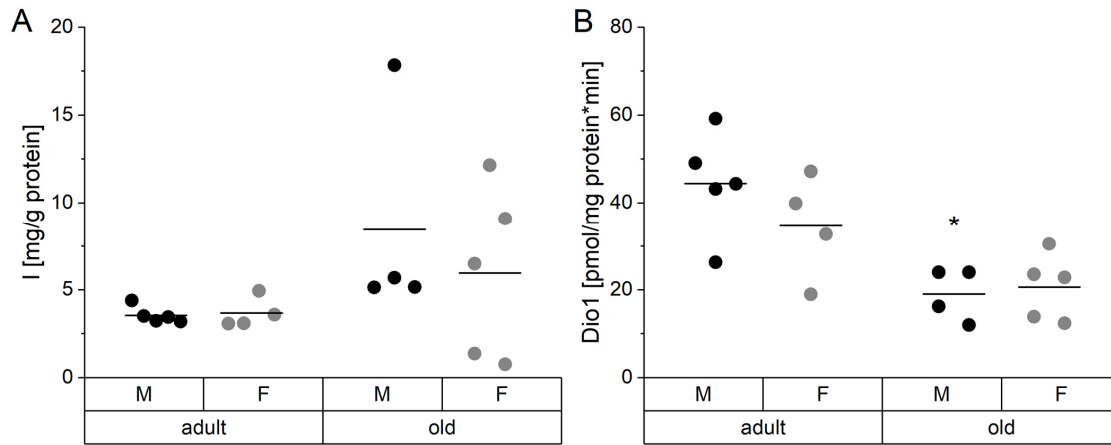

**Supplementary Figure 5. I content and deiodinase activity of the thyroid.** Thyroidal I content (A) and I-releasing enzyme activity of Dio1 (B) were determined by Sandell-Kolthoff-based I measurement in ammonium persulfate-digested organ and non-radioactive activity assay, respectively. Samples were thyroids of 4-5 adult (24 weeks) and old (109-114 weeks) mice of both sexes. I content is calculated to mg I per g protein. Statistical testing based on Two-Way ANOVA and post hoc analysis using Bonferroni's test with \*  $p < 0.05$  vs. adult.
