# Supplementary material for: Aging affects sex- and organ-specific trace element profiles in mice
Source: publisher site journal article supplement (doi:10.18632/aging.103572), 2020-07-03
Supplement: Supplementary file [file aging-v12i13-103572-supplementary-material-SD2.pdf]

## SUPPLEMENTARY TABLES

**Supplementary Table 1. Mouse data.**

| general features                             | adult ♂     | adult ♀     | elderly ♂   | elderly ♀   | age   | sex   | age X sex |
|----------------------------------------------|-------------|-------------|-------------|-------------|-------|-------|-----------|
| body weight [g]                              | 31.9 ± 1.8  | 25.7 ± 1.3  | 31.7 ± 1.4  | 29.9 ± 1.6  | *     | ***   | **        |
| relative liver weight [mg/g BW]              | 42.9 ± 14.4 | 48.6 ± 5.6  | 41.8 ± 5.2  | 53.6 ± 6.9  | n.s.  | 0.052 | n.s.      |
| relative spleen weight [mg/g BW]             | 2.4 ± 0.2   | 3.6 ± 0.5   | 2.5 ± 0.7   | 8.8 ± 7.0   | n.s.  | *     | n.s.      |
| relative heart weight [mg/g BW]              | 4.5 ± 0.3   | 4.4 ± 0.2   | 5.1 ± 1.1   | 6.0 ± 0.6   | **    | n.s.  | n.s.      |
| relative kidney weight [mg/g BW]             | 11.7 ± 0.3  | 11.4 ± 0.6  | 13.1 ± 2.8  | 16.4 ± 2.1  | **    | 0.078 | *         |
| relative cortex weight [mg/g BW]             | 9.5 ± 0.7   | 11.9 ± 0.9  | 10.0 ± 0.6  | 10.3 ± 2.6  | n.s.  | 0.069 | n.s.      |
| relative cerebellum weight [mg/g BW]         | 3.0 ± 1.5   | 5.0 ± 0.3   | 4.2 ± 0.3   | 5.8 ± 3.3   | n.s.  | 0.061 | n.s.      |
| relative length of small intestine [cm/g BW] | 1.07 ± 0.10 | 1.27 ± 0.10 | 1.14 ± 0.06 | 1.05 ± 0.03 | 0.074 | 0.070 | **        |
| relative length of colon [cm/g BW]           | 0.26 ± 0.02 | 0.30 ± 0.02 | 0.25 ± 0.02 | 0.29 ± 0.02 | n.s.  | **    | n.s.      |

Data represent mean ± standard deviation for various clinical parameters of 4-5 adult (24 weeks) and old (109-114 weeks) mice of both sexes fed with chow diet. Statistical testing based on Two-Way ANOVA and post hoc analysis using Bonferroni's test with \* p < 0.05, \*\* p < 0.01, \*\*\* p < 0.001, n.s. non-significant, p > 0.1. Trends with p < 0.1 were indicated. BW = body weight.

**Supplementary Table 2. TE concentrations in various organs of C57BL/6Jrj mice.**

| organ     | TE | unit    | adult ♂        | adult ♀        | elderly ♂      | elderly ♀      | age   | sex  | age X sex |
|-----------|----|---------|----------------|----------------|----------------|----------------|-------|------|-----------|
| serum     | Cu | [mg/L]  | 0.46 ± 0.07    | 0.44 ± 0.02    | 0.55 ± 0.03    | 0.99 ± 0.26    | ***   | **   | **        |
|           | I  | [µg/L]  | 97.09 ± 18.63  | 87.53 ± 17.01  | 107.27 ± 26.72 | 130.47 ± 26.47 | *     | n.s. | n.s.      |
|           | Fe | [mg/L]  | 2.15 ± 0.74    | 3.12 ± 1.97    | 1.87 ± 0.76    | 2.04 ± 0.41    | n.s.  | n.s. | n.s.      |
|           | Mn | [µg/L]  | 3.54 ± 0.56    | 3.14 ± 0.47    | 3.30 ± 0.79    | 2.93 ± 0.69    | n.s.  | n.s. | n.s.      |
|           | Se | [mg/L]  | 0.34 ± 0.03    | 0.30 ± 0.02    | 0.33 ± 0.05    | 0.32 ± 0.08    | n.s.  | n.s. | n.s.      |
|           | Zn | [mg/L]  | 0.91 ± 0.14    | 0.69 ± 0.10    | 0.72 ± 0.07    | 0.68 ± 0.02    | *     | **   | *         |
| liver     | Cu | [mg/kg] | 4.97 ± 0.58    | 4.22 ± 0.58    | 4.24 ± 0.31    | 3.97 ± 0.26    | *     | *    | n.s.      |
|           | Fe | [mg/kg] | 89.40 ± 1.82   | 137.72 ± 33.52 | 121.75 ± 38.01 | 217.20 ± 91.85 | *     | *    | n.s.      |
|           | Mn | [mg/kg] | 0.97 ± 0.09    | 1.11 ± 0.25    | 1.32 ± 0.29    | 1.14 ± 0.28    | n.s.  | n.s. | n.s.      |
|           | Se | [mg/kg] | 1.11 ± 0.09    | 1.15 ± 0.28    | 1.10 ± 0.11    | 1.12 ± 0.16    | n.s.  | n.s. | n.s.      |
|           | Zn | [mg/kg] | 26.10 ± 1.86   | 28.68 ± 4.95   | 26.80 ± 2.00   | 27.12 ± 2.54   | n.s.  | n.s. | n.s.      |
| duo-denum | Cu | [mg/kg] | 1.86 ± 0.07    | 1.89 ± 0.10    | 1.91 ± 0.21    | 2.14 ± 0.25    | 0.085 | n.s. | n.s.      |
|           | Fe | [mg/kg] | 47.21 ± 7.80   | 52.75 ± 15.41  | 49.80 ± 4.09   | 66.78 ± 9.00   | 0.098 | *    | n.s.      |
|           | Mn | [mg/kg] | 1.67 ± 0.42    | 1.36 ± 0.21    | 1.62 ± 0.31    | 1.64 ± 0.34    | n.s.  | n.s. | n.s.      |
|           | Se | [mg/kg] | 0.46 ± 0.04    | 0.45 ± 0.02    | 0.45 ± 0.04    | 0.43 ± 0.03    | n.s.  | n.s. | n.s.      |
|           | Zn | [mg/kg] | 20.92 ± 0.96   | 21.16 ± 4.24   | 22.28 ± 2.57   | 19.95 ± 1.37   | n.s.  | n.s. | n.s.      |
| heart     | Cu | [mg/kg] | 7.79 ± 0.94    | 8.86 ± 1.76    | 7.11 ± 0.46    | 7.01 ± 0.74    | *     | n.s. | n.s.      |
|           | Fe | [mg/kg] | 149.96 ± 13.23 | 164.38 ± 51.65 | 137.60 ± 8.15  | 130.74 ± 19.36 | n.s.  | n.s. | n.s.      |
|           | Mn | [mg/kg] | 0.87 ± 0.09    | 1.03 ± 0.21    | 0.83 ± 0.08    | 0.63 ± 0.18    | **    | n.s. | *         |
|           | Se | [mg/kg] | 0.40 ± 0.03    | 0.45 ± 0.10    | 0.37 ± 0.04    | 0.38 ± 0.05    | n.s.  | n.s. | n.s.      |
|           | Zn | [mg/kg] | 18.08 ± 3.54   | 20.16 ± 5.09   | 20.73 ± 5.96   | 16.98 ± 1.72   | n.s.  | n.s. | n.s.      |
| muscle    | Cu | [mg/kg] | 1.07 ± 0.14    | 0.97 ± 0.05    | 1.09 ± 0.06    | 1.19 ± 0.12    | *     | n.s. | 0.053     |
|           | Fe | [mg/kg] | 19.69 ± 1.20   | 16.65 ± 2.56   | 20.72 ± 1.19   | 27.55 ± 4.72   | ***   | n.s. | **        |
|           | Mn | [mg/kg] | 0.20 ± 0.03    | 0.18 ± 0.01    | 0.20 ± 0.03    | 0.13 ± 0.02    | 0.060 | **   | 0.060     |
|           | Se | [mg/kg] | 0.22 ± 0.02    | 0.21 ± 0.01    | 0.21 ± 0.02    | 0.21 ± 0.02    | n.s.  | n.s. | n.s.      |

|            |         |              |                |                |                |                |      |       |       |
|------------|---------|--------------|----------------|----------------|----------------|----------------|------|-------|-------|
| lung       | Zn      | [mg/kg]      | 3.27 ± 1.23    | 3.75 ± 1.20    | 3.35 ± 1.34    | 4.70 ± 1.60    | n.s. | n.s.  | n.s.  |
|            | Cu      | [mg/kg]      | 2.53 ± 0.23    | 2.76 ± 0.22    | 2.82 ± 0.36    | 3.52 ± 1.78    | n.s. | n.s.  | n.s.  |
|            | Fe      | [mg/kg]      | 111.58 ± 11.87 | 125.99 ± 29.20 | 133.62 ± 29.05 | 115.60 ± 22.28 | n.s. | n.s.  | n.s.  |
|            | Mn      | [mg/kg]      | 0.24 ± 0.03    | 0.33 ± 0.12    | 0.32 ± 0.09    | 0.25 ± 0.07    | n.s. | n.s.  | *     |
|            | Se      | [mg/kg]      | 0.46 ± 0.03    | 0.49 ± 0.04    | 0.50 ± 0.05    | 0.45 ± 0.05    | n.s. | n.s.  | 0.093 |
| kidney     | Zn      | [mg/kg]      | 17.77 ± 2.11   | 19.13 ± 1.86   | 17.02 ± 1.33   | 17.39 ± 2.25   | n.s. | n.s.  | n.s.  |
|            | Cu      | [mg/kg]      | 4.19 ± 0.34    | 4.28 ± 0.23    | 3.54 ± 0.65    | 3.73 ± 0.53    | *    | n.s.  | n.s.  |
|            | Fe      | [mg/kg]      | 94.23 ± 11.19  | 116.32 ± 18.21 | 77.00 ± 10.66  | 102.76 ± 39.65 | n.s. | *     | n.s.  |
|            | Mn      | [mg/kg]      | 1.45 ± 0.13    | 1.31 ± 0.09    | 1.10 ± 0.33    | 1.04 ± 0.23    | **   | n.s.  | n.s.  |
|            | Se      | [mg/kg]      | 1.54 ± 0.16    | 1.42 ± 0.10    | 1.66 ± 0.48    | 1.36 ± 0.09    | n.s. | 0.080 | n.s.  |
| bladder    | Zn      | [mg/kg]      | 19.05 ± 2.20   | 17.70 ± 0.97   | 15.10 ± 1.89   | 15.76 ± 1.58   | **   | n.s.  | n.s.  |
|            | Cu      | [mg/kg]      | 0.89 ± 0.09    | 1.19 ± 0.12    | 0.89 ± 0.08    | 1.08 ± 0.17    | n.s. | ***   | n.s.  |
|            | Fe      | [mg/kg]      | 13.80 ± 3.77   | 21.98 ± 2.14   | 25.07 ± 5.35   | 43.46 ± 5.26   | ***  | ***   | *     |
|            | Mn      | [mg/kg]      | 0.12 ± 0.01    | 0.18 ± 0.04    | 0.13 ± 0.02    | 0.12 ± 0.02    | *    | 0.075 | **    |
|            | Se      | [mg/kg]      | 0.33 ± 0.02    | 0.34 ± 0.01    | 0.32 ± 0.02    | 0.31 ± 0.06    | n.s. | n.s.  | n.s.  |
| cortex     | Zn      | [mg/kg]      | 31.97 ± 2.94   | 35.23 ± 4.43   | 29.45 ± 2.63   | 28.13 ± 5.69   | *    | n.s.  | n.s.  |
|            | Cu      | [mg/kg]      | 3.86 ± 0.09    | 3.84 ± 0.08    | 5.26 ± 0.39    | 5.16 ± 0.48    | ***  | n.s.  | n.s.  |
|            | Fe      | [mg/kg]      | 19.25 ± 0.46   | 19.24 ± 0.74   | 26.99 ± 0.81   | 23.02 ± 2.25   | ***  | **    | **    |
|            | Mn      | [mg/kg]      | 0.42 ± 0.01    | 0.44 ± 0.01    | 0.43 ± 0.02    | 0.41 ± 0.08    | n.s. | n.s.  | n.s.  |
|            | Se      | [mg/kg]      | 0.18 ± 0.00    | 0.21 ± 0.01    | 0.20 ± 0.01    | 0.22 ± 0.01    | **   | ***   | n.s.  |
| cerebellum | Zn      | [mg/kg]      | 16.22 ± 0.29   | 16.15 ± 0.17   | 16.37 ± 0.29   | 15.63 ± 1.63   | n.s. | n.s.  | n.s.  |
|            | Cu      | [mg/kg]      | 5.16 ± 0.27    | 4.88 ± 0.30    | 7.20 ± 0.80    | 6.06 ± 1.08    | ***  | *     | n.s.  |
|            | Fe      | [mg/kg]      | 21.69 ± 1.87   | 21.30 ± 1.94   | 24.64 ± 1.01   | 23.91 ± 2.52   | **   | n.s.  | n.s.  |
|            | Mn      | [mg/kg]      | 0.56 ± 0.05    | 0.59 ± 0.02    | 0.52 ± 0.03    | 0.49 ± 0.06    | **   | n.s.  | n.s.  |
|            | Se      | [mg/kg]      | 0.21 ± 0.01    | 0.22 ± 0.01    | 0.22 ± 0.01    | 0.23 ± 0.01    | **   | **    | n.s.  |
| Zn         | [mg/kg] | 13.84 ± 0.98 | 14.02 ± 2.05   | 13.26 ± 0.42   | 14.70 ± 1.44   | n.s.           | n.s. | n.s.  |       |

Values are shown as mean ± standard deviation of TE concentrations in various organs of 4-5 adult (24 weeks) and old (109-114 weeks) mice of both sexes receiving chow diet. Multielement analysis for Cu, I (only serum), Fe, Mn, Se, and Zn rely on ICP-MS/MS measurements. Statistical testing based on Two-Way ANOVA and post hoc analysis using Bonferroni's test with \* p < 0.05, \*\* p < 0.01, \*\*\* p < 0.001, n.s. non-significant. Trends with p < 0.1 were indicated.

**Supplementary Table 3. Correlations among serum marker of C57BL/6Jrj mice.**

| serum parameters |         | Mn     | I      | Cu     | Fe     | ferritin | transferrin | Se     | GPX*   | Selenop | Zn     | free Zn | TNF $\alpha$ |
|------------------|---------|--------|--------|--------|--------|----------|-------------|--------|--------|---------|--------|---------|--------------|
| Mn               | $r_s$   |        | -0.199 | -0.271 | 0.331  | -0.013   | -0.146      | -0.115 | 0.143  | 0.115   | 0.245  | 0.354   | -0.003       |
|                  | p-value |        | 0.428  | 0.276  | 0.179  | 0.958    | 0.565       | 0.651  | 0.570  | 0.672   | 0.328  | 0.150   | 0.990        |
| I                | $r_s$   | -0.199 |        | 0.701  | 0.315  | 0.302    | 0.368       | 0.077  | -0.288 | -0.662  | -0.360 | -0.018  | 0.430        |
|                  | p-value | 0.428  |        | 0.001  | 0.203  | 0.223    | 0.132       | 0.760  | 0.247  | 0.005   | 0.142  | 0.945   | 0.075        |
| Cu               | $r_s$   | -0.271 | 0.701  |        | -0.207 | 0.020    | 0.276       | 0.222  | -0.439 | -0.453  | -0.240 | -0.276  | 0.692        |
|                  | p-value | 0.276  | 0.001  |        | 0.409  | 0.938    | 0.268       | 0.376  | 0.069  | 0.078   | 0.336  | 0.268   | 0.001        |
| Fe               | $r_s$   | 0.331  | 0.315  | -0.207 |        | 0.410    | 0.069       | -0.152 | -0.079 | -0.003  | -0.220 | 0.112   | -0.011       |
|                  | p-value | 0.179  | 0.203  | 0.409  |        | 0.091    | 0.785       | 0.548  | 0.754  | 0.991   | 0.381  | 0.657   | 0.964        |
| ferritin         | $r_s$   | -0.013 | 0.302  | 0.020  | 0.41   |          | 0.067       | 0.036  | -0.379 | -0.324  | 0.034  | 0.236   | 0.152        |
|                  | p-value | 0.958  | 0.223  | 0.938  | 0.091  |          | 0.791       | 0.887  | 0.121  | 0.222   | 0.893  | 0.345   | 0.548        |
| transferrin      | $r_s$   | -0.146 | 0.368  | 0.276  | 0.069  | 0.067    |             | -0.201 | -0.032 | -0.406  | -0.129 | 0.137   | 0.286        |
|                  | p-value | 0.565  | 0.132  | 0.268  | 0.785  | 0.791    |             | 0.423  | 0.900  | 0.119   | 0.610  | 0.587   | 0.250        |
| Se               | $r_s$   | -0.115 | 0.077  | 0.222  | -0.152 | 0.036    | -0.201      |        | -0.042 | -0.368  | 0.509  | -0.067  | 0.075        |
|                  | p-value | 0.651  | 0.760  | 0.376  | 0.548  | 0.887    | 0.423       |        | 0.868  | 0.161   | 0.031  | 0.791   | 0.766        |
| GPX*             | $r_s$   | 0.143  | -0.288 | -0.439 | -0.079 | -0.379   | -0.032      | -0.042 |        | 0.268   | 0.123  | 0.428   | -0.317       |
|                  | p-value | 0.570  | 0.247  | 0.069  | 0.754  | 0.121    | 0.900       | 0.868  |        | 0.316   | 0.627  | 0.076   | 0.200        |
| Selenop          | $r_s$   | 0.115  | -0.662 | -0.453 | -0.003 | -0.324   | -0.406      | -0.368 | 0.268  |         | -0.179 | 0.082   | -0.071       |
|                  | p-value | 0.672  | 0.005  | 0.078  | 0.991  | 0.222    | 0.119       | 0.161  | 0.316  |         | 0.506  | 0.762   | 0.795        |
| Zn               | $r_s$   | 0.245  | -0.360 | -0.240 | -0.220 | 0.034    | -0.129      | 0.509  | 0.123  | -0.179  |        | 0.375   | -0.209       |
|                  | p-value | 0.328  | 0.142  | 0.336  | 0.381  | 0.893    | 0.610       | 0.031  | 0.627  | 0.506   |        | 0.126   | 0.404        |
| free Zn          | $r_s$   | 0.354  | -0.018 | -0.276 | 0.112  | 0.236    | 0.137       | -0.067 | 0.428  | 0.082   | 0.375  |         | -0.082       |
|                  | p-value | 0.150  | 0.945  | 0.268  | 0.657  | 0.345    | 0.587       | 0.791  | 0.076  | 0.762   | 0.126  |         | 0.748        |
| TNF $\alpha$     | $r_s$   | -0.003 | 0.430  | 0.692  | -0.011 | 0.152    | 0.286       | 0.075  | -0.317 | -0.071  | -0.209 | -0.082  |              |
|                  | p-value | 0.990  | 0.075  | 0.001  | 0.964  | 0.548    | 0.250       | 0.766  | 0.200  | 0.795   | 0.404  | 0.748   |              |

Explorative Spearman's correlation coefficient ( $r_s$ ) analysis was performed for all parameters analyzed in sera of 19 C57BL/6Jrj mice. Investigated parameters included levels of trace elements other markers, as well as enzyme activity (indicated with \*). Significance is reflected by p-values. Correlations with high correlation coefficient ( $r_s > 0.5$ ) and significant p-value are indicated in bold.

**Supplementary Table 4. Correlations among liver markers of C57BL/6Jrj mice.**

| liver parameter                       |                | Mn     | Fe                           | Cu           | Zn     | Se     | GPX*   | TNF $\alpha$ #               | IL1 $\beta$ #                | IL6#                         | mdC/<br>dC | hmdC<br>/<br>dC | 3-NT-modified<br>protein | NQO1*                        | GST*                         | FTH                          |
|---------------------------------------|----------------|--------|------------------------------|--------------|--------|--------|--------|------------------------------|------------------------------|------------------------------|------------|-----------------|--------------------------|------------------------------|------------------------------|------------------------------|
| <b>Mn</b>                             | r <sub>s</sub> |        | 0.445                        | -0.089       | 0.371  | 0.304  | -0.357 | 0.322                        | 0.362                        | 0.393                        | 0.086      | 0.087           | 0.226                    | 0.424                        | -0.296                       | 0.291                        |
|                                       | p-value        |        | 0.056                        | 0.717        | 0.118  | 0.205  | 0.133  | 0.179                        | 0.127                        | 0.096                        | 0.725      | 0.724           | 0.384                    | 0.071                        | 0.219                        | 0.241                        |
| <b>Fe</b>                             | r <sub>s</sub> | 0.445  |                              | -0.389       | 0.363  | 0.113  | -0.079 | <b>0.576</b>                 | <b>0.544</b>                 | <b>0.541</b>                 | 0.224      | -0.037          | -0.337                   | <b>0.710</b>                 | <b>-0.741</b>                | <b>0.811</b>                 |
|                                       | p-value        | 0.056  |                              | 0.100        | 0.127  | 0.644  | 0.748  | <b>0.010</b>                 | <b>0.016</b>                 | <b>0.017</b>                 | 0.356      | 0.881           | 0.185                    | <b>0.001</b>                 | <b>2.839x10<sup>-4</sup></b> | <b>4.447x10<sup>-5</sup></b> |
| <b>Cu</b>                             | r <sub>s</sub> | -0.089 | -0.389                       |              | 0.254  | 0.426  | -0.279 | -0.444                       | -0.384                       | -0.321                       | -0.383     | -0.321          | -0.137                   | -0.452                       | 0.429                        | <b>-0.612</b>                |
|                                       | p-value        | 0.717  | 0.100                        |              | 0.293  | 0.069  | 0.247  | 0.057                        | 0.105                        | 0.180                        | 0.105      | 0.180           | 0.599                    | 0.052                        | 0.067                        | <b>0.007</b>                 |
| <b>Zn</b>                             | r <sub>s</sub> | 0.371  | 0.363                        | 0.254        |        | 0.677  | 0.176  | 0.034                        | 0.200                        | 0.293                        | 0.071      | -0.284          | -0.360                   | 0.080                        | -0.414                       | 0.145                        |
|                                       | p-value        | 0.118  | 0.127                        | 0.293        |        | 0.001  | 0.470  | 0.889                        | 0.411                        | 0.223                        | 0.772      | 0.238           | 0.156                    | 0.745                        | 0.078                        | 0.567                        |
| <b>Se</b>                             | r <sub>s</sub> | 0.304  | 0.113                        | 0.426        | 0.677  |        | -0.067 | -0.132                       | -0.025                       | 0.156                        | -0.246     | -0.097          | -0.187                   | -0.279                       | -0.197                       | -0.034                       |
|                                       | p-value        | 0.205  | 0.644                        | 0.069        | 0.001  | 0.786  | 0.591  | 0.920                        | 0.523                        | 0.310                        | 0.694      | 0.473           | 0.247                    | 0.419                        | 0.893                        |                              |
| <b>GPX*</b>                           | r <sub>s</sub> | -0.357 | -0.079                       | 0.279        | 0.176  | 0.067  |        | -0.167                       | -0.039                       | -0.023                       | 0.090      | -0.204          | -0.466                   | -0.054                       | -0.033                       | 0.090                        |
|                                       | p-value        | 0.133  | 0.748                        | 0.247        | 0.470  | 0.786  |        | 0.495                        | 0.875                        | 0.926                        | 0.716      | 0.403           | 0.060                    | 0.825                        | 0.892                        | 0.723                        |
| <b>TNF<math>\alpha</math>#</b>        | r <sub>s</sub> | 0.322  | <b>0.576</b>                 | -0.444       | 0.034  | -0.132 | 0.167  |                              | <b>0.747</b>                 | <b>0.726</b>                 | 0.371      | 0.326           | -0.091                   | <b>0.582</b>                 | <b>-0.663</b>                | <b>0.752</b>                 |
|                                       | p-value        | 0.179  | <b>0.010</b>                 | 0.057        | 0.889  | 0.591  | 0.495  |                              | <b>2.353x10<sup>-4</sup></b> | <b>4.292x10<sup>-4</sup></b> | 0.118      | 0.173           | 0.729                    | <b>0.009</b>                 | <b>0.002</b>                 | <b>3.160x10<sup>-4</sup></b> |
| <b>IL1<math>\beta</math>#</b>         | r <sub>s</sub> | 0.362  | <b>0.544</b>                 | -0.384       | 0.200  | 0.025  | 0.039  | <b>0.747</b>                 |                              | <b>0.902</b>                 | 0.134      | 0.423           | -0.076                   | <b>0.614</b>                 | <b>-0.691</b>                | <b>0.701</b>                 |
|                                       | p-value        | 0.127  | <b>0.016</b>                 | 0.105        | 0.411  | 0.920  | 0.875  | <b>2.353x10<sup>-4</sup></b> |                              | <b>1.342x10<sup>-7</sup></b> | 0.584      | 0.071           | 0.772                    | <b>0.005</b>                 | <b>0.001</b>                 | <b>0.001</b>                 |
| <b>IL6#</b>                           | r <sub>s</sub> | 0.393  | <b>0.541</b>                 | -0.321       | 0.293  | 0.156  | -0.023 | <b>0.726</b>                 | <b>0.902</b>                 |                              | 0.004      | <b>0.514</b>    | -0.176                   | <b>0.646</b>                 | <b>-0.744</b>                | <b>0.744</b>                 |
|                                       | p-value        | 0.096  | <b>0.017</b>                 | 0.180        | 0.223  | 0.523  | 0.926  | <b>4.292x10<sup>-4</sup></b> | <b>1.342x10<sup>-7</sup></b> |                              | 0.986      | <b>0.024</b>    | 0.498                    | <b>0.003</b>                 | <b>2.611x10<sup>-4</sup></b> | <b>3.992x10<sup>-4</sup></b> |
| <b>mdC/d<br/>C</b>                    | r <sub>s</sub> | 0.086  | 0.224                        | -0.383       | 0.071  | 0.246  | 0.090  | 0.371                        | 0.134                        | 0.004                        | -0.140     | -0.140          | -0.113                   | 0.181                        | -0.033                       | 0.223                        |
|                                       | p-value        | 0.725  | 0.356                        | 0.105        | 0.772  | 0.310  | 0.716  | 0.118                        | 0.584                        | 0.986                        |            | 0.566           | 0.666                    | 0.459                        | 0.892                        | 0.374                        |
| <b>hmdC/d<br/>C</b>                   | r <sub>s</sub> | 0.087  | -0.037                       | -0.321       | 0.284  | 0.097  | 0.204  | 0.326                        | 0.423                        | <b>0.514</b>                 | -0.140     | -0.140          | <b>0.527</b>             | 0.137                        | -0.181                       | 0.183                        |
|                                       | p-value        | 0.724  | 0.881                        | 0.180        | 0.238  | 0.694  | 0.403  | 0.173                        | 0.071                        | <b>0.024</b>                 | 0.566      | 0.566           | <b>0.030</b>             | 0.576                        | 0.459                        | 0.468                        |
| <b>3-NT-<br/>modified<br/>protein</b> | r <sub>s</sub> | 0.226  | -0.337                       | -0.137       | 0.360  | 0.187  | 0.466  | -0.091                       | -0.076                       | -0.176                       | 0.113      | <b>0.527</b>    | -0.309                   | 0.395                        | -0.426                       |                              |
|                                       | p-value        | 0.384  | 0.185                        | 0.599        | 0.156  | 0.473  | 0.060  | 0.729                        | 0.772                        | 0.498                        | 0.666      | <b>0.030</b>    | 0.228                    | 0.117                        | 0.088                        |                              |
| <b>NQO1*</b>                          | r <sub>s</sub> | 0.424  | <b>0.710</b>                 | -0.452       | 0.080  | -0.279 | 0.054  | <b>0.582</b>                 | <b>0.614</b>                 | <b>0.646</b>                 | 0.181      | 0.137           | -0.309                   |                              | <b>-0.633</b>                | <b>0.759</b>                 |
|                                       | p-value        | 0.071  | <b>0.001</b>                 | 0.052        | 0.745  | 0.247  | 0.825  | <b>0.009</b>                 | <b>0.005</b>                 | <b>0.003</b>                 | 0.459      | 0.576           | 0.228                    |                              | <b>0.004</b>                 | <b>2.636x10<sup>-4</sup></b> |
| <b>GST*</b>                           | r <sub>s</sub> | -0.296 | <b>-0.741</b>                | 0.429        | -0.414 | 0.197  | 0.033  | <b>-0.663</b>                | <b>-0.691</b>                | <b>-0.744</b>                | 0.033      | -0.181          | 0.395                    | <b>-0.633</b>                |                              | <b>-0.851</b>                |
|                                       | p-value        | 0.219  | <b>2.839x10<sup>-4</sup></b> | 0.067        | 0.078  | 0.419  | 0.892  | <b>0.002</b>                 | <b>0.001</b>                 | <b>2.611x10<sup>-4</sup></b> | 0.892      | 0.459           | 0.117                    | <b>0.004</b>                 |                              | <b>7.422x10<sup>-6</sup></b> |
| <b>FTH</b>                            | r <sub>s</sub> | 0.291  | <b>0.811</b>                 | -0.612       | 0.145  | -0.034 | 0.090  | <b>0.752</b>                 | <b>0.701</b>                 | <b>0.744</b>                 | 0.223      | 0.183           | -0.426                   | <b>0.759</b>                 | <b>-0.851</b>                |                              |
|                                       | p-value        | 0.241  | <b>4.447x10<sup>-5</sup></b> | <b>0.007</b> | 0.567  | 0.893  | 0.723  | <b>3.160x10<sup>-4</sup></b> | <b>0.001</b>                 | <b>3.992x10<sup>-4</sup></b> | 0.374      | 0.468           | 0.088                    | <b>2.636x10<sup>-4</sup></b> | <b>7.422x10<sup>-6</sup></b> |                              |

Explorative Spearman's correlation coefficient (r<sub>s</sub>) analysis was performed for all analyzed parameters in liver of 19 C57BL/6Jrj mice. Investigated parameters included levels of trace elements, functional or aging marker, next to enzyme activity and relative expression levels (indicated with \* and #, respectively). Significance is reflected by p-values. Correlations with high correlation coefficient (r<sub>s</sub>>0.5) and significant p-value are indicated in bold.
